# Supplementary material for: Compressive stress-mediated p38 activation required for ERα + phenotype in breast cancer
Source: PubMed Central journal article supplement (PMC8630031; doi:10.1038/s41467-021-27220-9), 2021-11-29
Supplement: 41467_2021_27220_MOESM3_ESM.pdf [file 41467_2021_27220_MOESM3_ESM.pdf]

File Name: Supplementary Data 1.

Description: Histopathological and immunohistochemical parameters of the breast cancer and reduction mammoplasty samples used in the study.

File Name: Supplementary Data 2.

Description: The list of antibodies used in the study.
